# Supplementary material for: Congruency of Information Rather Than Body Ownership Enhances Motor Performance in Highly Embodied Virtual Reality
Source: PubMed Central journal article supplement (PMC8291288; doi:10.3389/fnins.2021.678909), 2021-07-02
Supplement: Table_2.pdf [file Table_2.pdf]

***Supplementary Material S2***  
**Reports of statistical analyses**

**BLOCK 1**

|                      |                                            |                  |            |
|----------------------|--------------------------------------------|------------------|------------|
| <b>One-way ANOVA</b> | Control items<br>Baseline questionnaire    | $F(4,45) = 0.36$ | $p = 0.84$ |
| <b>One-way ANOVA</b> | Control items<br>Embodiment questionnaire  | $F(4,45) = 0.51$ | $p = 0.73$ |
| <b>One-way ANOVA</b> | BO-Task<br>Embodiment questionnaire        | $F(4,45) = 1.27$ | $p = 0.30$ |
| <b>Correlation</b>   | GSR-mean and BO-Task                       | $r(46) = -0.22$  | $p = 0.13$ |
| <b>Correlation</b>   | GSR-peak and BO-Task                       | $r(46) = -0.25$  | $p = 0.08$ |
| <b>One-way ANOVA</b> | Reaction time Baseline                     | $F(4,45) = 0.71$ | $p = 0.59$ |
| <b>One-way ANOVA</b> | False positives in Task 1                  | $F(4,45) = 1.03$ | $p = 0.40$ |
| <b>One-way ANOVA</b> | False negatives in Task 1                  | $F(4,45) = 2.03$ | $p = 0.11$ |
| <b>Two-way ANOVA</b> | Reaction times Task 1<br>Main effect Trial | $F(4,45) = 1.16$ | $p = 0.32$ |
| <b>Correlation</b>   | Reaction times and BO-Task                 | $r(48) = -0.16$  | $p = 0.26$ |

**BLOCK 2**

|                      |                                          |                  |            |
|----------------------|------------------------------------------|------------------|------------|
| <b>One-way ANOVA</b> | Body ownership<br>Baseline questionnaire | $F(4,45) = 0.57$ | $p = 0.69$ |
| <b>One-way ANOVA</b> | Control items<br>Baseline questionnaire  | $F(4,45) = 1.51$ | $p = 0.22$ |
| <b>One-way ANOVA</b> | BO-Task<br>Embodiment questionnaire      | $F(4,45) = 0.73$ | $p = 0.58$ |
| <b>One-way ANOVA</b> | BO-Diff                                  | $F(4,45) = 1.59$ | $p = 0.19$ |
| <b>One-way ANOVA</b> | Agency<br>Embodiment questionnaire       | $F(4,45) = 0.84$ | $p = 0.51$ |
| <b>Correlation</b>   | GSR-mean and BO-Task                     | $r(47) = -0.10$  | $p = 0.48$ |
| <b>Correlation</b>   | GSR-peak and BO-Task                     | $r(47) = -0.07$  | $p = 0.72$ |

|                      |                                 |                  |            |
|----------------------|---------------------------------|------------------|------------|
| <b>Two-way ANOVA</b> | Completion time Task 2          |                  |            |
|                      | Main effect Trial               | $F(2,90) = 0.54$ | $p = 0.54$ |
|                      | Interaction (Condition x Trial) | $F(8,90) = 0.50$ | $p = 0.80$ |
| <b>Two-way ANOVA</b> | Accuracy Task 2                 |                  |            |
|                      | Main effect Condition           | $F(4,45) = 0.25$ | $p = 0.91$ |
|                      | Interaction (Condition x Trial) | $F(8,90) = 1.26$ | $p = 0.28$ |

**ACROSS TASKS**

|                      |                                           |                  |            |
|----------------------|-------------------------------------------|------------------|------------|
| <b>Two-way ANOVA</b> | BO-Baseline                               |                  |            |
|                      | Main effect Condition                     | $F(4,45) = 1.76$ | $p = 0.15$ |
|                      | Interaction (Condition x Block)           | $F(8,90) = 2.25$ | $p = 0.08$ |
| <b>Two-way ANOVA</b> | BO-Task                                   |                  |            |
|                      | Main effect Condition                     | $F(4,45) = 0.91$ | $p = 0.47$ |
|                      | Interaction (Condition x Block)           | $F(8,90) = 1.91$ | $p = 0.13$ |
| <b>Correlation</b>   | Reaction times Task 1 and accuracy Task 2 | $r(48) = 0.09$   | $p = 0.52$ |
